# Supplementary material for: Rationale and design of the Lowlands Saves Lives trial: a randomised trial to compare CPR quality and long-term attitude towards CPR performance between face-to-face and virtual reality training with the Lifesaver VR app
Source: PubMed Central journal article supplement — BMJ Open. 2019 Nov 21;9(11):e033648. doi: 10.1136/bmjopen-2019-033648 (PMC6886955; doi:10.1136/bmjopen-2019-033648), 2019-11-21
Supplement: bmjopen-2019-033648supp001.pdf [file bmjopen-2019-033648supp001.pdf]

**Supplement 1 – CPR-skill assessment test**

(European Resuscitation Council CPR/AED course assessment document)



**EUROPEAN  
RESUSCITATION  
COUNCIL**

**2016.V2**

**BLS assessment record**

Candidate Name: \_\_\_\_\_

Date: \_\_\_\_\_

Instructor: \_\_\_\_\_

| Skill                              | The candidate                                                                                                                                                | Achieved |    | Comments |
|------------------------------------|--------------------------------------------------------------------------------------------------------------------------------------------------------------|----------|----|----------|
|                                    |                                                                                                                                                              | Yes      | No |          |
| Check response                     | Demonstrates gently shaking and shouting to establish responsiveness                                                                                         |          |    |          |
| Assess breathing                   | Demonstrates head tilt and chin lift                                                                                                                         |          |    |          |
| Assess breathing                   | Demonstrates look, listen and feel for normal breathing for no more than 10 sec (does not count aloud)                                                       |          |    |          |
| Call emergency services (Get help) | Describes how to phone for emergency services: 112, unresponsive and non-breathing victim, AED                                                               |          |    |          |
| Chest compressions                 | Demonstrates effective chest compressions; rate 100-120/min, depth 5-6 cm; hand position: centre of the chest. Minimises interruptions in chest compressions |          |    |          |
| Rescue breaths                     | Demonstrates rescue breaths sufficient to cause the chest to rise and fall                                                                                   |          |    |          |
| Compression : ventilation ratio    | Demonstrates ratio of 30 compressions to 2 ventilations                                                                                                      |          |    |          |
| Activate AED                       | Switch the AED on or, if a helper is present, ask him/her to do it                                                                                           |          |    |          |
| Attach pads                        | Demonstrates attaching pads in correct position                                                                                                              |          |    |          |
| Stand clear                        | Allows rhythm analysis whilst making sure that nobody touches the victim (including visual sweep and verbal instruction)                                     |          |    |          |
| Deliver shock                      | Demonstrates rapid and safe delivery of a shock (including visual sweep and verbal instruction to stand clear)                                               |          |    |          |
| Follow AED instructions            | Demonstrates listening to and executing AED instructions                                                                                                     |          |    |          |
| CPR                                | Minimises interruptions in chest compressions and demonstrates correct sequence in ratio of 30 compressions to 2 ventilations                                |          |    |          |

CPR: Cardiopulmonary resuscitation; AED: Automated external defibrillator.

**Supplement 2** – Questionnaire for study participants

|                                                                          |                                                                                                                                                                                                                                             |  |
|--------------------------------------------------------------------------|---------------------------------------------------------------------------------------------------------------------------------------------------------------------------------------------------------------------------------------------|--|
| Study number & instructor<br>(to be completed by investigator)           |                                                                                                                                                                                                                                             |  |
| E-mail address*                                                          |                                                                                                                                                                                                                                             |  |
| Sex                                                                      | <input type="radio"/> Female<br><input type="radio"/> Male<br><input type="radio"/> Do not wish to disclose                                                                                                                                 |  |
| Age                                                                      |                                                                                                                                                                                                                                             |  |
| Weight                                                                   |                                                                                                                                                                                                                                             |  |
| Highest level of education                                               | <input type="radio"/> Primary education<br><input type="radio"/> Secondary education<br><input type="radio"/> Short cycle tertiary education<br><input type="radio"/> Bachelor or equivalent<br><input type="radio"/> Master or equivalent  |  |
| Healthcare professional                                                  | <input type="radio"/> Yes<br><input type="radio"/> No                                                                                                                                                                                       |  |
| Have you used any drugs/narcotics in the past 24 hours, besides alcohol? | <input type="radio"/> Yes, which:<br><input type="radio"/> No<br><input type="radio"/> Do not wish to disclose                                                                                                                              |  |
| <i>Previous CPR experience</i>                                           |                                                                                                                                                                                                                                             |  |
| CPR course                                                               | <input type="radio"/> No<br><input type="radio"/> Yes, which level<br><input type="radio"/> BLS<br><input type="radio"/> BLS+AED<br><input type="radio"/> ALS<br><input type="radio"/> Other:<br><br>Date last course:                      |  |
| Witnessed a cardiac arrest                                               | <input type="radio"/> No<br><input type="radio"/> Yes, ... times<br><input type="radio"/> Only as a witness<br><input type="radio"/> CPR performed as bystander/layperson<br><input type="radio"/> CPR performed as healthcare professional |  |
| The victim was                                                           | <input type="radio"/> A stranger<br><input type="radio"/> A relative or other acquaintance                                                                                                                                                  |  |

\* If you want to be approached for a follow-up study or receive the information digitally
